# Supplementary material
Source: Springer Nature journal article supplement (https://www.springermedizin.de/resource/supplementary/12885_2007_860_MOESM1_ESM.pdf/9470528)
Supplement: MOESM1 [file 9470528]

Question: What has your leisure time physical activity level been during the last year? (Estimate a weekly average for the year, walking to work counts as leisure time)

| Response categories                           | Hours per week |                  |                  |                  |
|-----------------------------------------------|----------------|------------------|------------------|------------------|
|                                               | No             | < 1              | 1-2              | $\geq 3$         |
| Low-level activity<br>(not sweaty/breathless) | Inactive       | Inactive         | Minimally active | Minimally active |
| High-level activity<br>(sweaty/breathless)    | Inactive       | Minimally active | Highly active    | Highly active    |

 “Inactive”

 “Minimally active”

 “Highly active”
